# Supplementary material
Source: MDPI journal article supplement (https://www.mdpi.com/2072-4292/15/6/1537)
Supplement: s1 [file s1]

Article

# Transformation of Agricultural Landscapes and Its Consequences for Natural Forests in Southern Myanmar within the Last 40 Years

Phyu Thaw Tun, Thanh Thi Nguyen \* and Andreas Buerkert

Organic Plant Production and Agroecosystems Research in the Tropics and Subtropics, Faculty of Organic Agricultural Sciences, University of Kassel, 37213 Witzenhausen, , Germany; phyuthawtun@uni-kassel.de (P.T.T.); buerkert@uni-kassel.de (A.B.)

\* Correspondence: tropcrops@uni-kassel.de; Tel.: +49-5542-98-1229

## Supplements

**Figure S1:** Erosion of coastlines (B), (C), and (D) by the strong waves (A) and (C) from high engine-power marine transportation vehicles in Kyunsu township of Southern Myanmar in 2021.

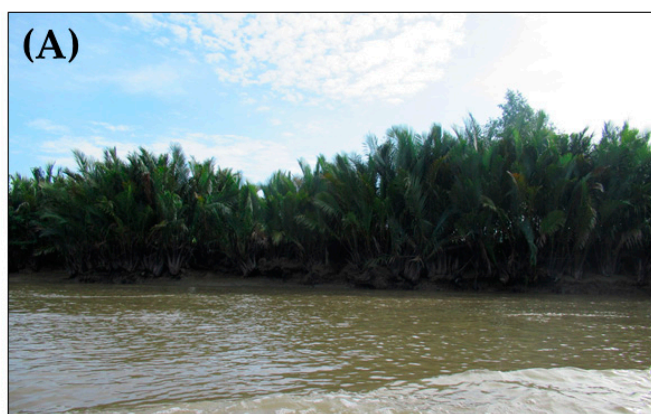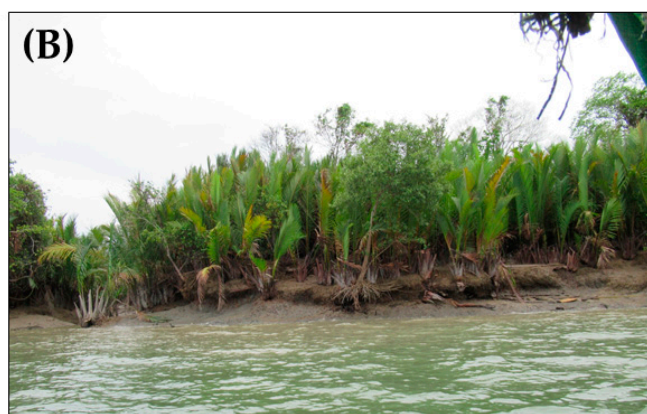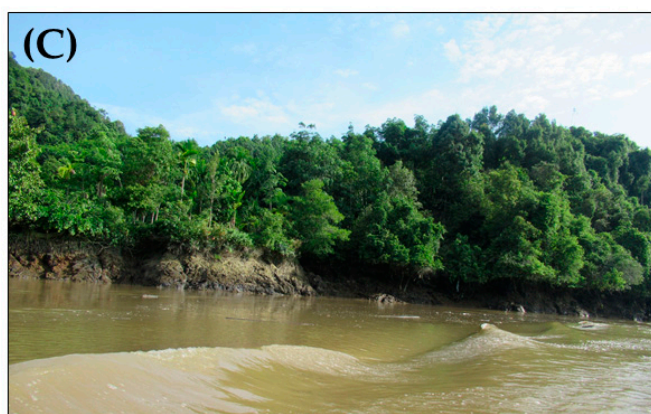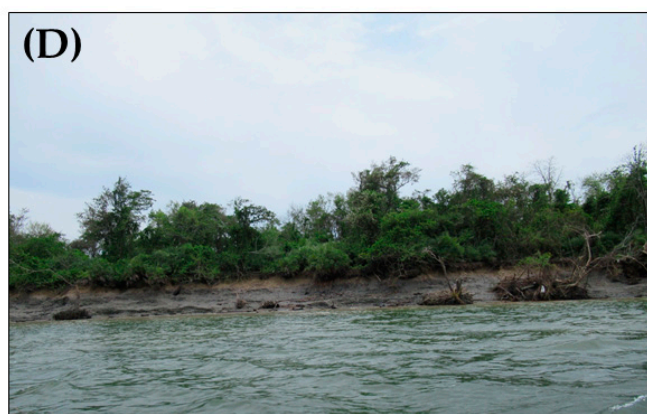

**Figure S2.** Transformation of LULC classes: Water Bodies (C1), Paddy Fields (C2), Open Forests (C3), Closed Forests (C4), Mangrove Forests (C5), Plantations (C6), Settlement Areas (C7), Aquaculture Areas (C8), and Others (C9) of Kyunsu township in Southern Myanmar across 40 years: (A) between 1978–1989 including Water Bodies, (B) between 1978–1989 excluding Water Bodies, (C) between 1989–2000 including Water Bodies, (D) between 1989–2000 excluding Water Bodies, (E) between 2000–2011 including Water Bodies, (F) between 2000–2011 excluding Water Bodies, (G) between 2011–2020 including Water Bodies, (H) between 2011–2020 excluding Water Bodies, (I) between 1978–2020 including Water Bodies, (J) between 1978–2020 excluding Water Bodies. Ticks indicate the area of LULC in 100,000 ha.

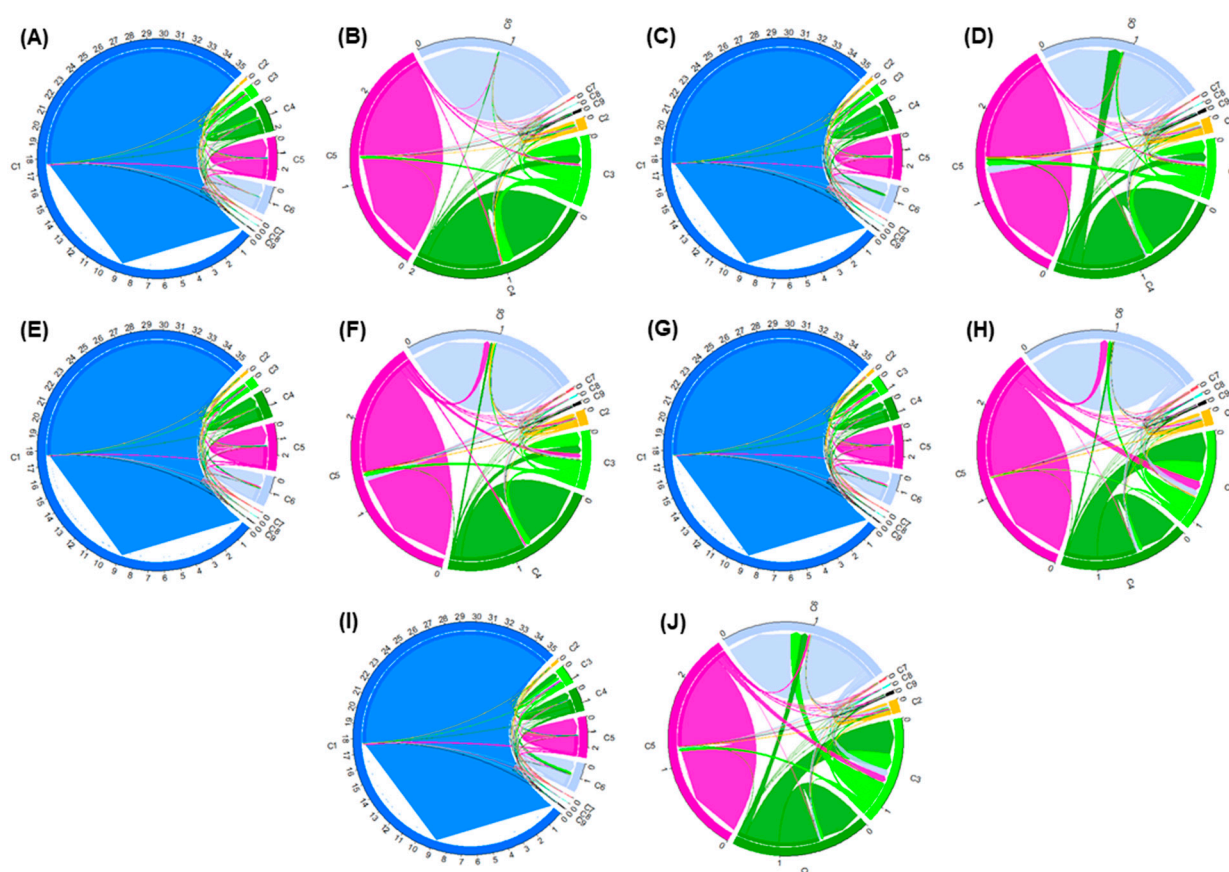

**Table S1:** Reference training samples used for supervised random forest (RF) classifier to classify Closed Forests and Non-Closed Forests of Kyunsu township in Southern Myanmar across 40 years.

| Year | Land Cover Classe  | No. of Reference Training Samples |         |
|------|--------------------|-----------------------------------|---------|
|      |                    | Point                             | Polygon |
| 1978 | Closed Forests     | 115                               | 42      |
|      | Non-Closed Forests | -                                 | 33      |
| 1989 | Closed Forests     | -                                 | 64      |
|      | Non-Closed Forests | -                                 | 87      |
| 2000 | Closed Forests     | -                                 | 64      |
|      | Non-Closed Forests | -                                 | 87      |
| 2011 | Closed Forests     | -                                 | 64      |
|      | Non-Closed Forests | -                                 | 87      |
| 2020 | Closed Forests     | -                                 | 64      |
|      | Non-Closed Forests | -                                 | 86      |

**Table S2:** Reference training samples used for supervised RF classifier to classify Mangrove Forests and Non-Mangrove Forests of Kyunsu township in Southern Myanmar across 40 years.

| Year | Land Cover Classe    | No. of Reference Training Samples |         |
|------|----------------------|-----------------------------------|---------|
|      |                      | Point                             | Polygon |
| 1978 | Mangrove Forests     | 29                                | 48      |
|      | Non-Mangrove Forests | 29                                | 17      |
| 1989 | Mangrove Forests     | -                                 | 143     |
|      | Non-Mangrove Forests | -                                 | 67      |
| 2000 | Mangrove Forests     | -                                 | 143     |
|      | Non-Mangrove Forests | -                                 | 67      |
| 2011 | Mangrove Forests     | -                                 | 143     |
|      | Non-Mangrove Forests | -                                 | 67      |
| 2020 | Mangrove Forests     | -                                 | 143     |
|      | Non-Mangrove Forests | -                                 | 67      |

**Table S3:** Transformation matrix of LULC classes: Water Bodies (C1), Paddy Fields (C2), Open Forests (C3), Closed Forests (C4), Mangrove Forests (C5), Plantations (C6), Settlement Areas (C7), Aquaculture Areas (C8), and Others (C9) (in ha) of Kyunsu township in Southern Myanmar between 1978 and 1989.

| From | To        |      |        |        |         |        |     |    |     |
|------|-----------|------|--------|--------|---------|--------|-----|----|-----|
|      | C1        | C2   | C3     | C4     | C5      | C6     | C7  | C8 | C9  |
| C1   | 1,759,701 | 696  | 1647   | 1145   | 3675    | 121    | 12  | 0  | 571 |
| C2   | 127       | 3996 | 113    | 834    | 197     | 1      | 8   | 0  | 3   |
| C3   | 803       | 2995 | 21,005 | 14,460 | 3131    | 459    | 26  | 40 | 525 |
| C4   | 245       | 184  | 10,176 | 86,920 | 44      | 627    | 0   | 0  | 23  |
| C5   | 7233      | 517  | 2017   | 799    | 127,944 | 83     | 15  | 20 | 111 |
| C6   | 5         | 5    | 295    | 676    | 117     | 88,620 | 0   | 0  | 195 |
| C7   | 23        | 24   | 6      | 26     | 7       | 0      | 536 | 0  | 9   |
| C8   | 0         | 1    | 0      | 0      | 2       | 0      | 0   | 67 | 0   |
| C9   | 197       | 7    | 65     | 100    | 18      | 23     | 1   | 0  | 804 |

**Table S4:** Transformation matrix of LULC classes: Water Bodies (C1), Paddy Fields (C2), Open Forests (C3), Closed Forests (C4), Mangrove Forests (C5), Plantations (C6), Settlement Areas (C7), Aquaculture Areas (C8), and Others (C9) (in ha) of Kyunsu township in Southern Myanmar between 1989 and 2000.

| From | To        |      |        |        |         |        |     |     |      |
|------|-----------|------|--------|--------|---------|--------|-----|-----|------|
|      | C1        | C2   | C3     | C4     | C5      | C6     | C7  | C8  | C9   |
| C1   | 1,764,924 | 137  | 208    | 49     | 2693    | 31     | 10  | 1   | 288  |
| C2   | 568       | 4961 | 1133   | 113    | 1435    | 151    | 13  | 2   | 47   |
| C3   | 1208      | 342  | 14,507 | 10,363 | 6471    | 2332   | 7   | 1   | 93   |
| C4   | 261       | 753  | 10,599 | 75,852 | 2321    | 14,988 | 14  | 0   | 170  |
| C5   | 3994      | 552  | 1345   | 98     | 128,500 | 296    | 47  | 280 | 25   |
| C6   | 124       | 2083 | 2982   | 1952   | 8936    | 73,584 | 91  | 0   | 180  |
| C7   | 5         | 6    | 2      | 0      | 5       | 2      | 578 | 0   | 1    |
| C8   | 0         | 0    | 2      | 0      | 19      | 0      | 0   | 107 | 0    |
| C9   | 439       | 16   | 304    | 11     | 248     | 184    | 4   | 0   | 1033 |

**Table S5:** Transformation matrix of LULC classes: Water Bodies (C1), Paddy Fields (C2), Open Forests (C3), Closed Forests (C4), Mangrove Forests (C5), Plantations (C6), Settlement Areas (C7), Aquaculture Areas (C8), and Others (C9) (in ha) of Kyunsu township in Southern Myanmar between 2000 and 2011.

| From | To        |      |        |        |         |        |     |     |     |
|------|-----------|------|--------|--------|---------|--------|-----|-----|-----|
|      | C1        | C2   | C3     | C4     | C5      | C6     | C7  | C8  | C9  |
| C1   | 1,766,766 | 96   | 452    | 109    | 3856    | 97     | 83  | 25  | 27  |
| C2   | 236       | 4612 | 536    | 13     | 719     | 2547   | 146 | 26  | 15  |
| C3   | 506       | 1217 | 15,754 | 7398   | 4591    | 1320   | 55  | 42  | 195 |
| C4   | 159       | 299  | 9339   | 75,251 | 578     | 2806   | 5   | 0   | 10  |
| C5   | 4528      | 1092 | 4789   | 1753   | 130,847 | 6873   | 152 | 429 | 168 |
| C6   | 54        | 92   | 1508   | 383    | 4945    | 84,247 | 89  | 2   | 249 |
| C7   | 8         | 11   | 4      | 0      | 5       | 17     | 711 | 0   | 5   |
| C8   | 6         | 1    | 4      | 0      | 30      | 1      | 1   | 349 | 1   |
| C9   | 396       | 70   | 278    | 34     | 24      | 213    | 57  | 1   | 765 |

**Table S6:** Transformation matrix of LULC classes: Water Bodies (C1), Paddy Fields (C2), Open Forests (C3), Closed Forests (C4), Mangrove Forests (C5), Plantations (C6), Settlement Areas (C7), Aquaculture Areas (C8), and Others (C9) (in ha) of Kyunsu township in Southern Myanmar between 2011 and 2020.

| From | To        |      |        |        |         |        |      |     |      |
|------|-----------|------|--------|--------|---------|--------|------|-----|------|
|      | C1        | C2   | C3     | C4     | C5      | C6     | C7   | C8  | C9   |
| C1   | 1,763,367 | 669  | 1933   | 127    | 4737    | 171    | 35   | 25  | 1596 |
| C2   | 67        | 4558 | 1460   | 46     | 708     | 597    | 34   | 4   | 17   |
| C3   | 775       | 650  | 21,929 | 4674   | 777     | 3392   | 23   | 33  | 411  |
| C4   | 332       | 311  | 35,342 | 46,303 | 174     | 2418   | 3    | 0   | 56   |
| C5   | 5162      | 1000 | 10,734 | 201    | 119,254 | 8654   | 33   | 390 | 169  |
| C6   | 63        | 2720 | 6834   | 3207   | 654     | 84,137 | 60   | 15  | 433  |
| C7   | 12        | 41   | 19     | 0      | 14      | 33     | 1144 | 1   | 34   |
| C8   | 3         | 7    | 12     | 0      | 105     | 3      | 1    | 741 | 4    |
| C9   | 38        | 59   | 198    | 1      | 24      | 316    | 25   | 0   | 774  |

**Table S7:** Transformation matrix of LULC classes: Water Bodies (C1), Paddy Fields (C2), Open Forests (C3), Closed Forests (C4), Mangrove Forests (C5), Plantations (C6), Settlement Areas (C7), Aquaculture Areas (C8), and Others (C9) (in ha) of Kyunsu township in Southern Myanmar between 1978 and 2020.

| From | To        |      |        |        |         |        |     |      |      |
|------|-----------|------|--------|--------|---------|--------|-----|------|------|
|      | C1        | C2   | C3     | C4     | C5      | C6     | C7  | C8   | C9   |
| C1   | 1,757,674 | 548  | 2907   | 470    | 4014    | 493    | 97  | 17   | 1349 |
| C2   | 84        | 3508 | 334    | 6      | 558     | 676    | 94  | 1    | 16   |
| C3   | 1205      | 1857 | 19,231 | 4126   | 4036    | 12,135 | 164 | 90   | 601  |
| C4   | 647       | 407  | 40,523 | 47,950 | 157     | 8474   | 6   | 0    | 54   |
| C5   | 9938      | 1146 | 7412   | 21     | 116,290 | 2317   | 160 | 1039 | 416  |
| C6   | 98        | 2453 | 7930   | 1972   | 1349    | 75,413 | 258 | 13   | 428  |
| C7   | 10        | 29   | 6      | 0      | 5       | 13     | 548 | 0    | 19   |
| C8   | 0         | 0    | 1      | 0      | 22      | 0      | 0   | 48   | 0    |
| C9   | 162       | 66   | 133    | 1      | 15      | 194    | 30  | 0    | 615  |
